# Supplementary material for: RASSF1A Suppression as a Potential Regulator of Mechano-Pathobiology Associated with Mammographic Density in BRCA Mutation Carriers
Source: MDPI journal article supplement (doi:10.3390/cancers13133251), 2021-06-29
Supplement: s1 [file s1]

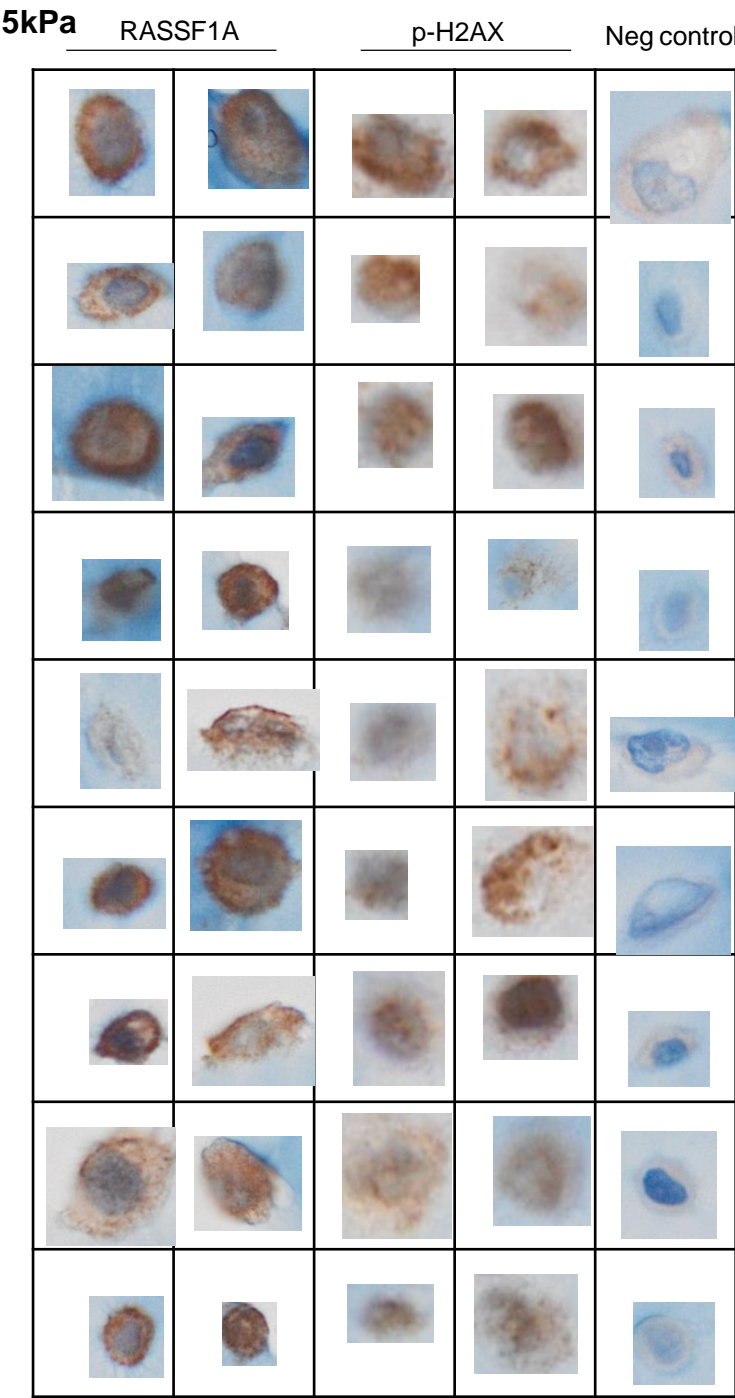

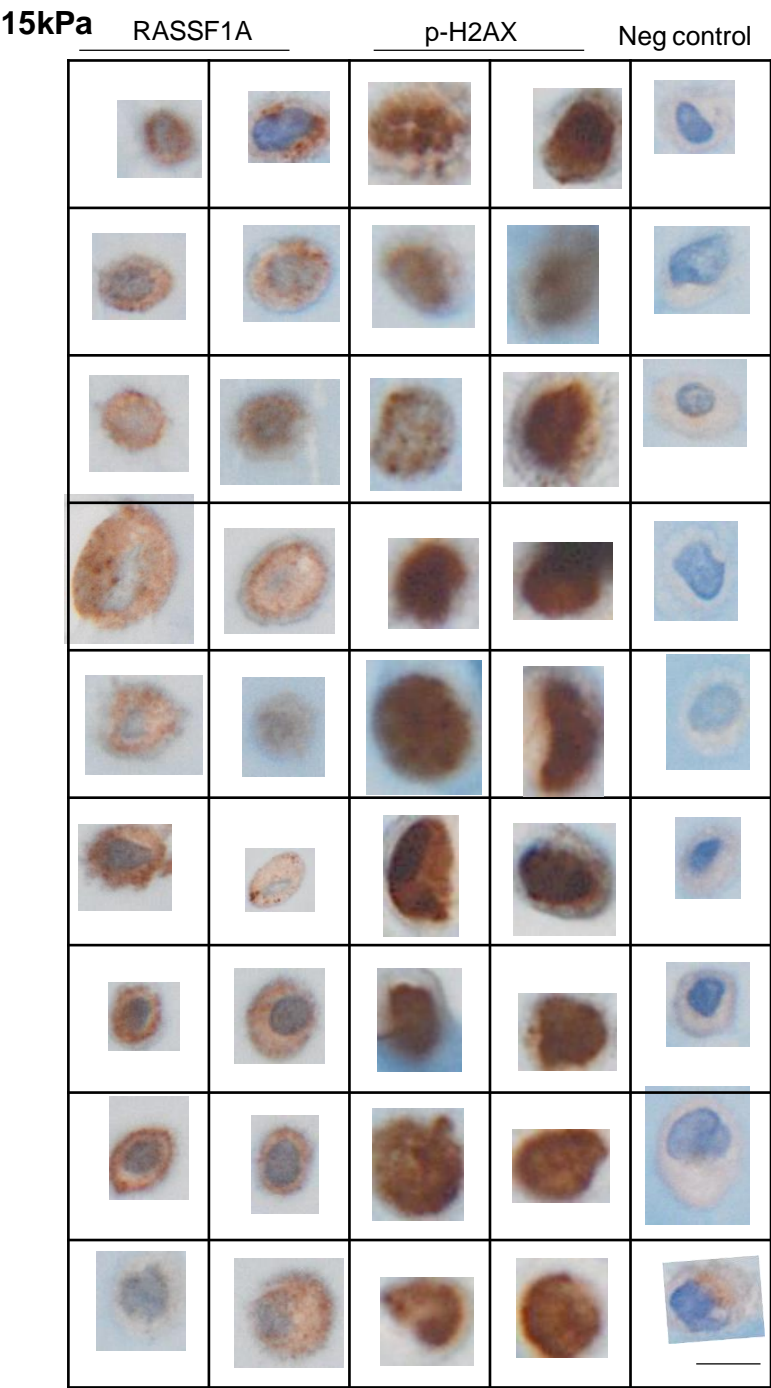

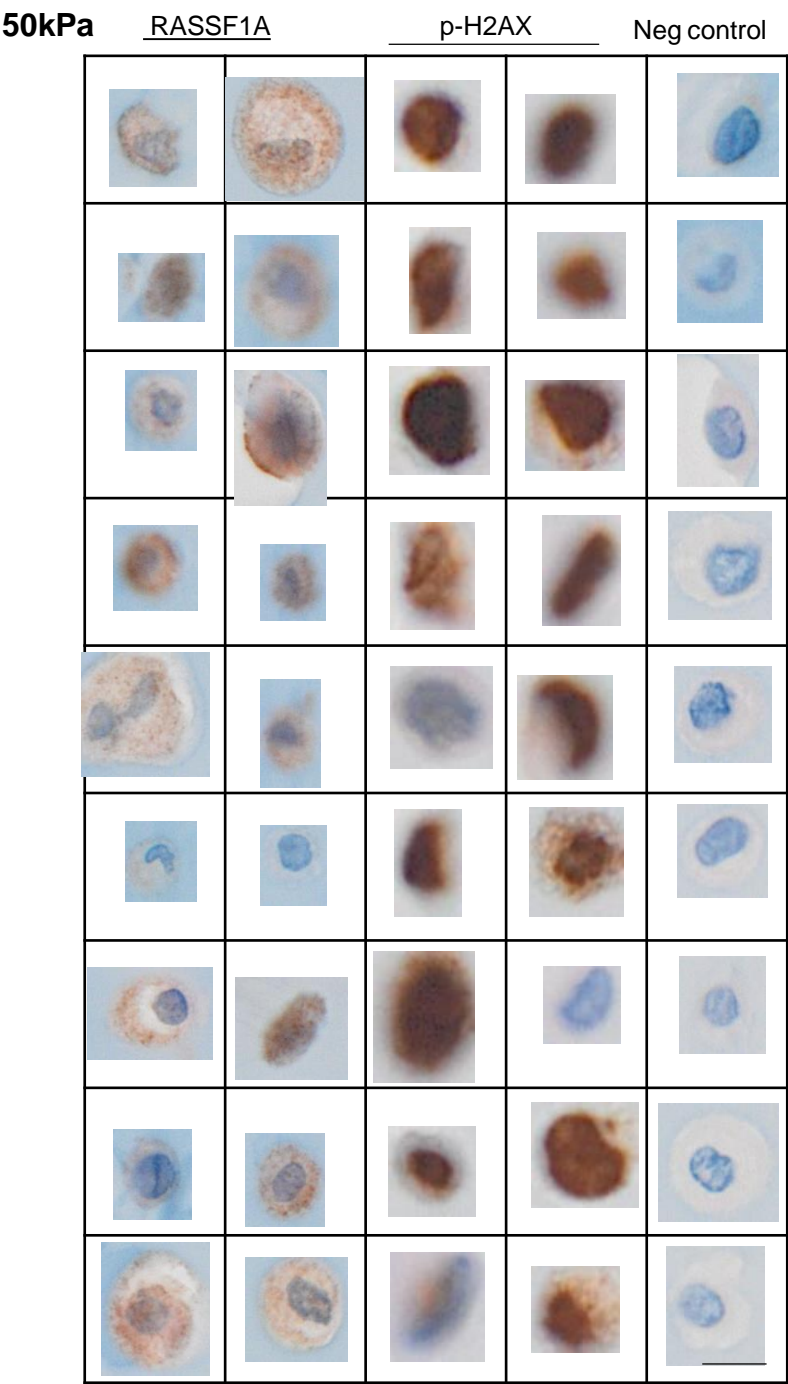

| Stiffness<br>(kPa) | Activated<br>caspase-3                                                              |
|--------------------|-------------------------------------------------------------------------------------|
| 5                  |    |
| 15                 |   |
| 50                 |  |

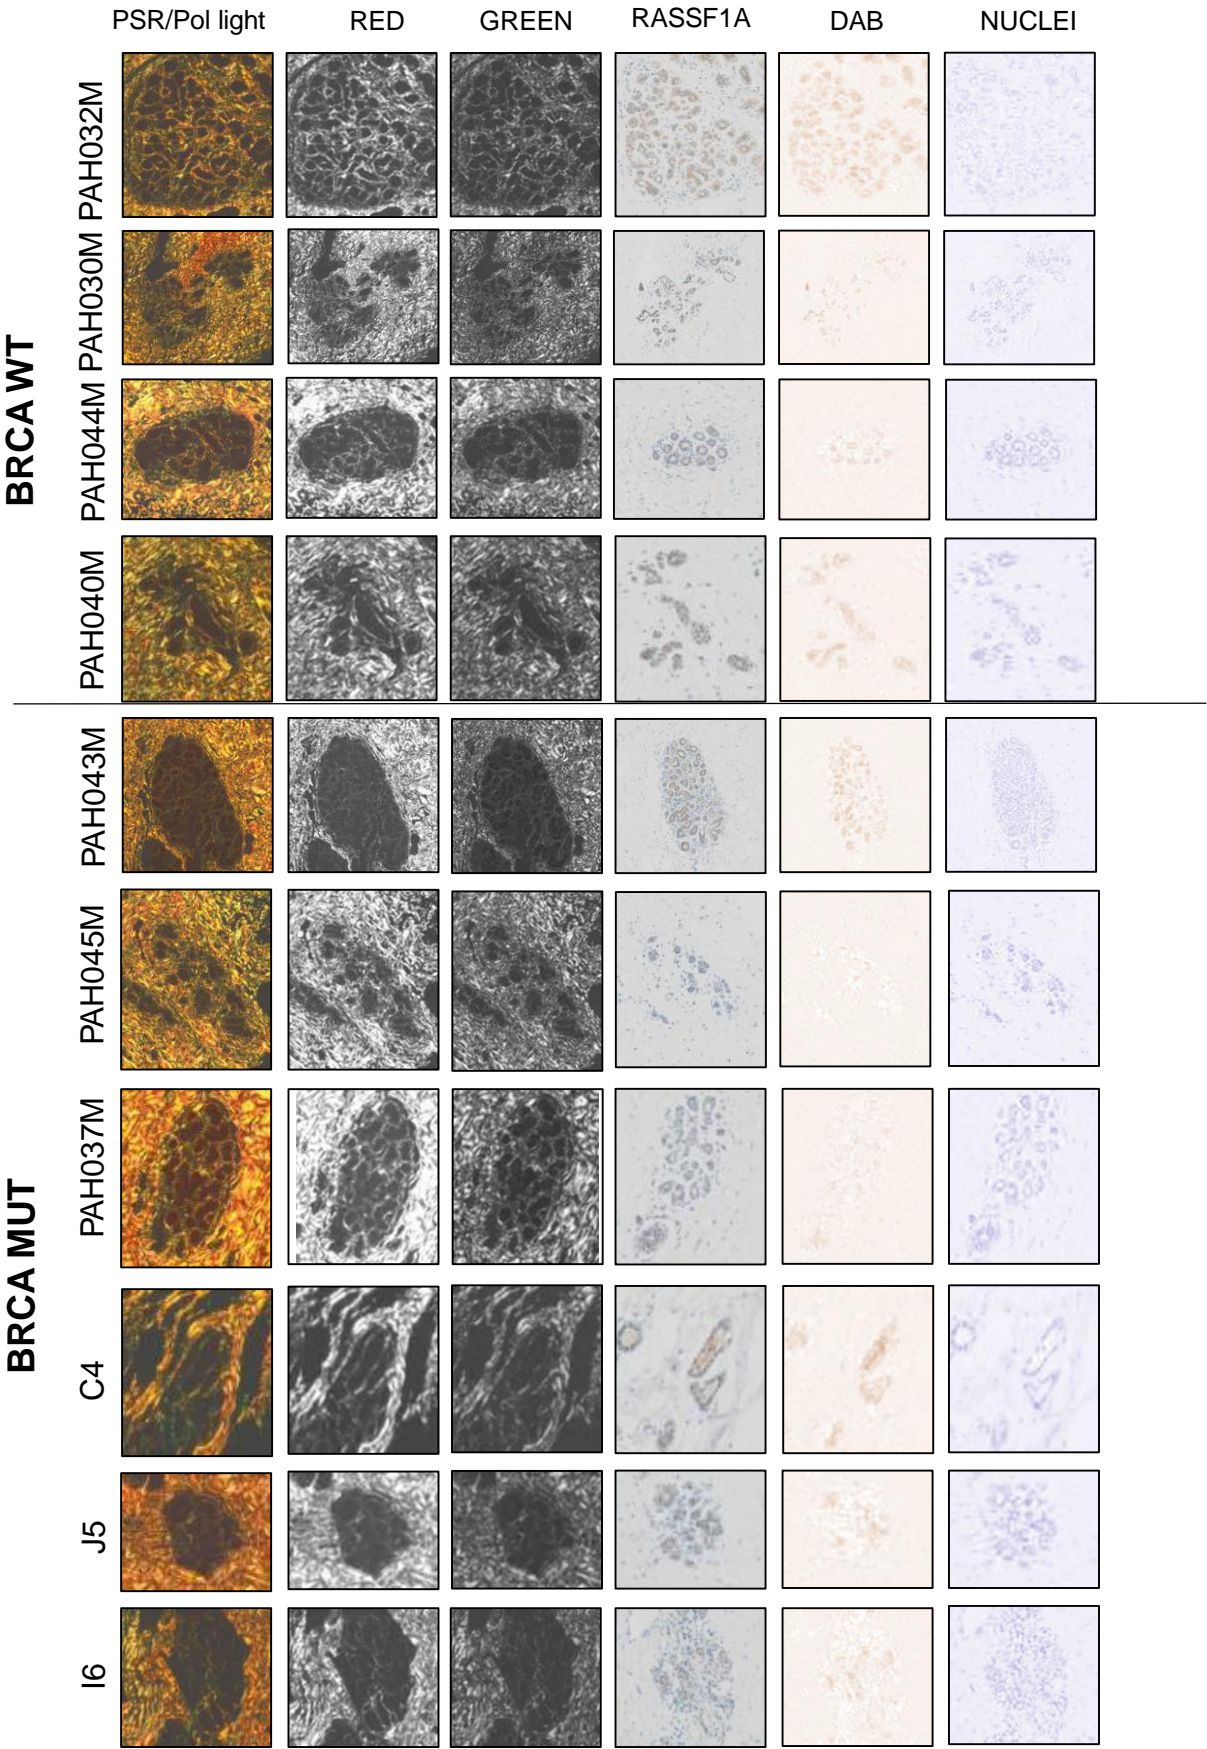

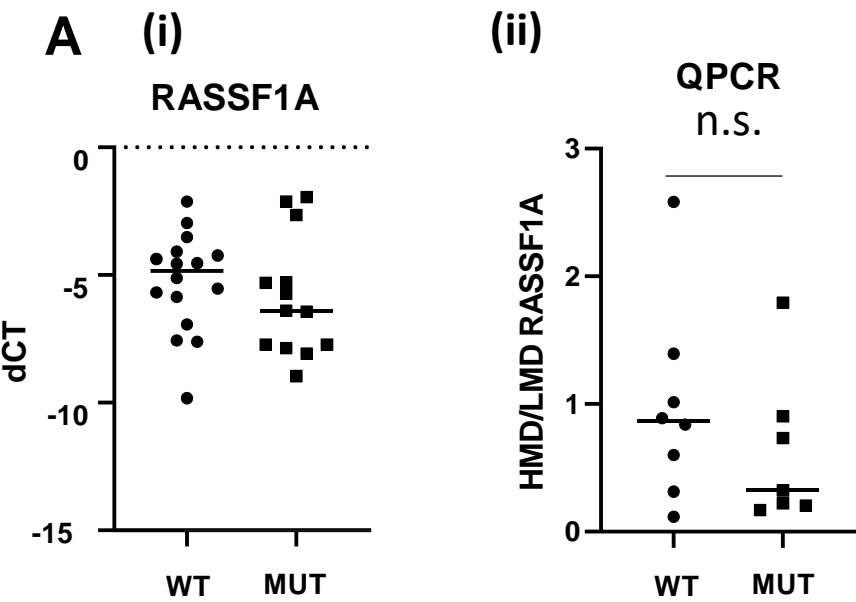

| Risk factor                         | Population 10-year risk (%) |
|-------------------------------------|-----------------------------|
| BiRADs cat 1 (LMD)                  | 1.0                         |
| BiRADs cat 4 (HMD)                  | 3.6                         |
| BRCA1 mutation + BiRADs cat 1 (LMD) | 13.3                        |
| BRCA2 mutation + BiRADs cat 1 (LMD) | 7.9                         |
| BRCA1 mutation + BiRADs cat 4 (HMD) | 38.20                       |
| BRCA2 mutation + BiRADs cat 4 (HMD) | 24.90                       |
